# Supplementary material for: Firearm access and adolescent suicide risk: toward a clearer understanding of effect size
Source: PubMed Central journal article supplement — Inj Prev. 2020 May 14;27(3):264–70. doi: 10.1136/injuryprev-2019-043605 (PMC8165151; doi:10.1136/injuryprev-2019-043605), 2020-05-14
Supplement: injuryprev-2019-043605supp001.pdf [file injuryprev-2019-043605supp001.pdf]

**Supplemental Figure.** Confounder-adjusted risk ratio by proposed confounder and a range of possible associations between the confounder and suicide on the odds ratio scale.

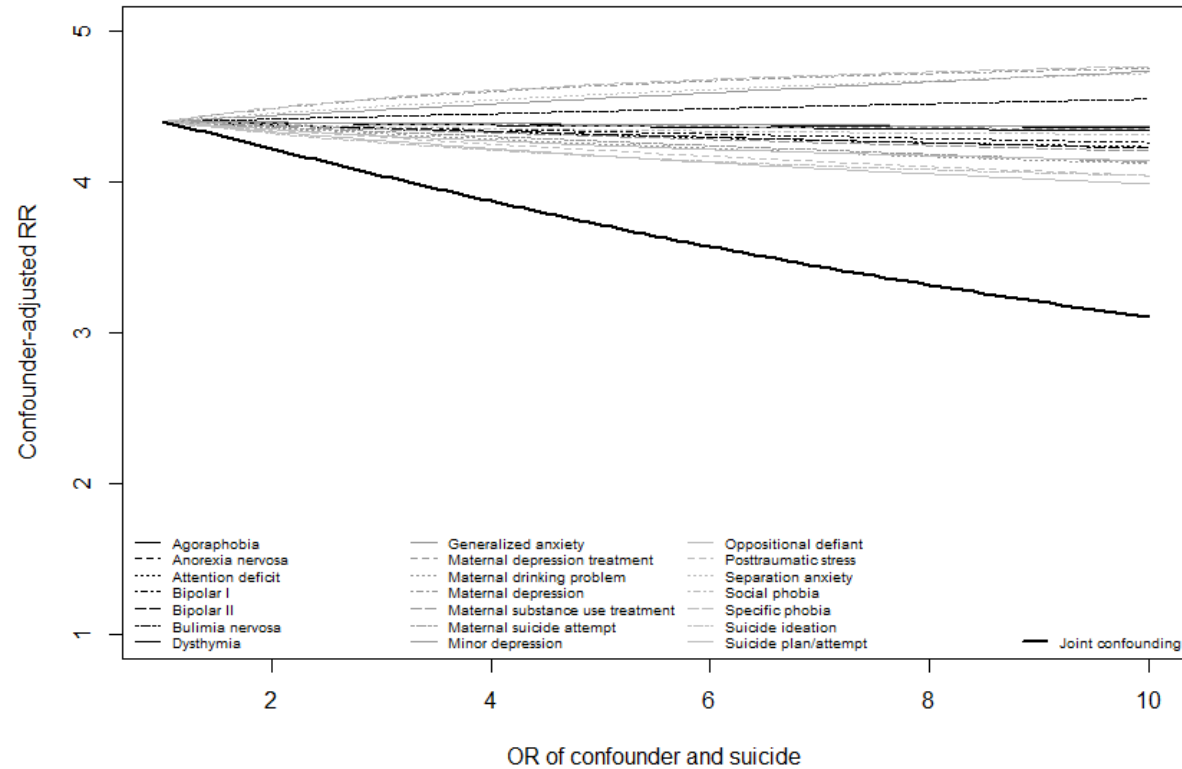

**Supplemental Table.** Comparison of measures available in the NCSA to those previously accounted for in the study by Brent et al.

| Potential confounder      | Confounding control approach used by Brent et al. | Proxy available in the NCSA                                              |
|---------------------------|---------------------------------------------------|--------------------------------------------------------------------------|
| Gender                    | Matching                                          | Gender                                                                   |
| Age                       | Matching                                          | Age                                                                      |
| Race/ethnicity            | Restriction (predominantly white)                 | Race/ethnicity (non-Hispanic white; non-Hispanic black; Hispanic; other) |
| Socioeconomic status      | Matching*                                         | Parental education; poverty income ratio; number of biological parents   |
| Geographic region         | Restriction (only in PA) and matching (by county) | Geographic region; urbanicity                                            |
| Major depressive disorder | Analytic adjustment                               | CIDI major depressive disorder                                           |
| Conduct disorder          | Analytic adjustment                               | CIDI conduct disorder                                                    |
| Substance use disorder    | Analytic adjustment                               | CIDI substance use disorder                                              |

\*Specifically, matching on the Hollingshead Four Factor Scale, a scale which measures socioeconomic status via the four domains of marital status, employment status, educational attainment, and occupation type.
